# Supplementary material for: Enhancing Undergraduate Teaching and Research with aDrosophilaVirginizing System
Source: Atypon-hosted journal article supplement (doi:10.1187/cbe.06-03-0152), 2006-12-01
Supplement: appendix3.pdf [file appendix3.pdf]

**APPENDIX THREE: Biology 114/104 Genetics Lab Survey**

*This anonymous survey is only for the Drosophila portion of today's lab. This is new lab material, and your input will help improve it for future classes.*

Which class are you enrolled in?       Biol 104       Biol 114

---

Are you planning on majoring in Biology?       Yes       No

---

Did you examine Drosophila crosses in high school?       Yes       No

---

*On a scale of 1 to 5, rate the following statements.*

|                                                                                    |
|------------------------------------------------------------------------------------|
| 1= strongly disagree    2= disagree    3= neutral    4= agree    5= strongly agree |
|------------------------------------------------------------------------------------|

|                                                                                           |  |
|-------------------------------------------------------------------------------------------|--|
| The topic of genetics is interesting to me.                                               |  |
| I found the Drosophila portion of today's lab interesting.                                |  |
| The pre-lab questions helped me prepare for lab today.                                    |  |
| This lab helped me understand the genetics material presented in lecture.                 |  |
| The lab helped me understand the difference between dominant and recessive alleles.       |  |
| The lab helped me understand the difference between autosomal and sex-linked inheritance. |  |

|                                                                                                                                                                                      |
|--------------------------------------------------------------------------------------------------------------------------------------------------------------------------------------|
| Comments: feel free to make suggestions on how the Drosophila material can be improved, what you liked about it, <i>et cetera</i> . Use the back of the form if you need more space. |
|--------------------------------------------------------------------------------------------------------------------------------------------------------------------------------------|
